# Supplementary material for: Using the Random Forest for Identifying Key Physicochemical Properties of Amino Acids to Discriminate Anticancer and Non-Anticancer Peptides
Source: MDPI journal article supplement (doi:10.3390/ijms241310854), 2023-06-29
Supplement: s1 [file s1]

## Supporting Information

UniProt

BLASTAlignPeptide searchID mappingSPARQLUniProtKB

Melittin AND anti-Cancer

Advanced | List

Search

Help

Status

Reviewed (Swiss-Prot) (3)

Taxonomy

Filter by taxonomy

Proteins with

Biotechnological use (1)

Function (3)

Mass spectrometry (2)

UniProtKB 3 results

BLASTAlignMap IDsDownloadAddView: CardsTableCustomize columnsShare

| Entry  | Entry Name | Protein Names    | Gene Names | Organism                                                     | Length |
|--------|------------|------------------|------------|--------------------------------------------------------------|--------|
| P0DPR9 | MELN_APICE | Melittin-N[...]  | MELT       | Apis cerana (Indian honeybee)                                | 70 AA  |
| C0HL98 | MAC1_MACFV | Macropin[...]    |            | Macropis fulvipes (Solitary bee) (Megilla fulvipes)          | 13 AA  |
| P0DQX5 | HAL2_HALST | Halictine-2[...] |            | Halictus sexcinctus (Six-banded furrow bee) (Apis sexcincta) | 12 AA  |

UniProt

BLASTAlignPeptide searchID mappingSPARQLUniProtKB

Temporins AND anti-Cancer

Advanced | List

Search

Help

Status

Reviewed (Swiss-Prot) (1)

Taxonomy

Filter by taxonomy

Proteins with

3D structure (1)

UniProtKB 1 result

BLASTAlignMap IDsDownloadAddView: CardsTableCustomize columnsShare

| Entry  | Entry Name | Protein Names     | Gene Names | Organism                               | Length |
|--------|------------|-------------------|------------|----------------------------------------|--------|
| P57104 | TPL_RANTE  | Temporin-1TI[...] |            | Rana temporaria (European common frog) | 13 AA  |

Figure S1. Search Melittin and Temporins in UniProt

```

>sp|C0HL98|MAC1_MACFV Macropin OS=Macropis fulvipes OX=465486 PE=1 SV=1 Melittin
GFGMALKLLKKVL
>sp|P0DQX5|HAL2_HALST Halictine-2 OS=Halictus sexcinctus OX=115105 PE=1 SV=1 Melittin
GKWMSLLKHILK
>sp|P0DPR9|MELN_APICE Melittin-N OS=Apis cerana OX=7461 GN=MELT PE=1 SV=1 Melittin
MKFLVNVALVFMVVYISYIYAAPEPEPAPEPEAEADAEADPEAGIGAVLKVLTTGLPALINWIKRKRQQG
>Melittin|HY-P0233
GIGAVLKVLTTGLPALISWIKRKRQQ
>sp|P57104|TPL_RANTE Temporin-1T1 OS=Rana temporaria OX=8407 PE=1 SV=1|
FVQWFSKFLGRIL

```

**Figure S2. Five sequences data of Melittin and Temporins from UniProt and <https://www.medchemexpress.cn/>. They are stored in FASTA format.**

## RFaaindexACP

a web server for the identification of anti-cancer peptides merely using sequence-based amino-acids index features

[Home](#) | [Server](#) | [Dataset](#)

### Input Peptides sequence in *FASTA* format and *Run*

Please input no more than 10 sequences. If there is a 504 error or other errors, please wait for a few minutes and refresh the page again. Or wait for several minutes and then resubmit the task. If you need to predict more 10 sequences, please contact Dr.Lv. **MAKE SURE** peptides sequences in **ONE line ! and the length of them is not more than 100!**

```
>sp|COHL98|MAC1_MACFV Macropin OS=Macropis fulvipes OX=465486 PE=1 SV=1 Melittin
GFGMALKLLKKVL
>sp|P0DQX5|HAL2_HALST Halictine-2 OS=Halictus sexcinctus OX=115105 PE=1 SV=1 Melittin
GKWMSSLKHILK
>sp|P0DPR9|MELN_APICE Melittin-N OS=Apis cerana OX=7461 GN=MELT PE=1 SV=1 Melittin
MKFLVNVALVFMVYISYIYAAPEPEPAPEPEAEADAEADPEAGIGAVLKVLTTGLPALINWIKRKRQQG
>Melittin|HY-P0233
GIGAVLKVLTTGLPALISWIKRKRQQ
>sp|P57104|TPL_RANTE Temporin-1T1 OS=Rana temporaria OX=8407 PE=1 SV=1|
FVQWFSKFLGRIL
```

Run

Clear

Figure S3. Five sequences data of Melittin and Temporins input in the webserver.

| <p><b><i>RFaaindexACP</i></b><br/> a web server for the identification of ANTI-CANCER peptides merely using AAindex features</p> <p><a href="#">Home</a>   <a href="#">Server</a>   <a href="#">Dataset</a></p> <p><b><i>Results</i></b></p> |                      |            |
|----------------------------------------------------------------------------------------------------------------------------------------------------------------------------------------------------------------------------------------------|----------------------|------------|
| SEQUENCES                                                                                                                                                                                                                                    | ANTI-CANCER PEPTIDES | CONFIDENCE |
| GFGMALKLLKKVL                                                                                                                                                                                                                                | YES                  | 65.81%     |
| GKWMSLLKHILK                                                                                                                                                                                                                                 | YES                  | 67.57%     |
| MKFLVNVALVFMVVYISYIYAAPPEPEPAPEAEADAEADPEAGIG...                                                                                                                                                                                             | YES                  | 52.92%     |
| GIGAVLKVLTTGLPALISWIKRKRQQ                                                                                                                                                                                                                   | YES                  | 60.21%     |
| FVQWFSKFLGRIL                                                                                                                                                                                                                                | YES                  | 65.57%     |

**Figure S4.** The predict results of five sequences data of Melittin and Temporins are shown in the webserver.

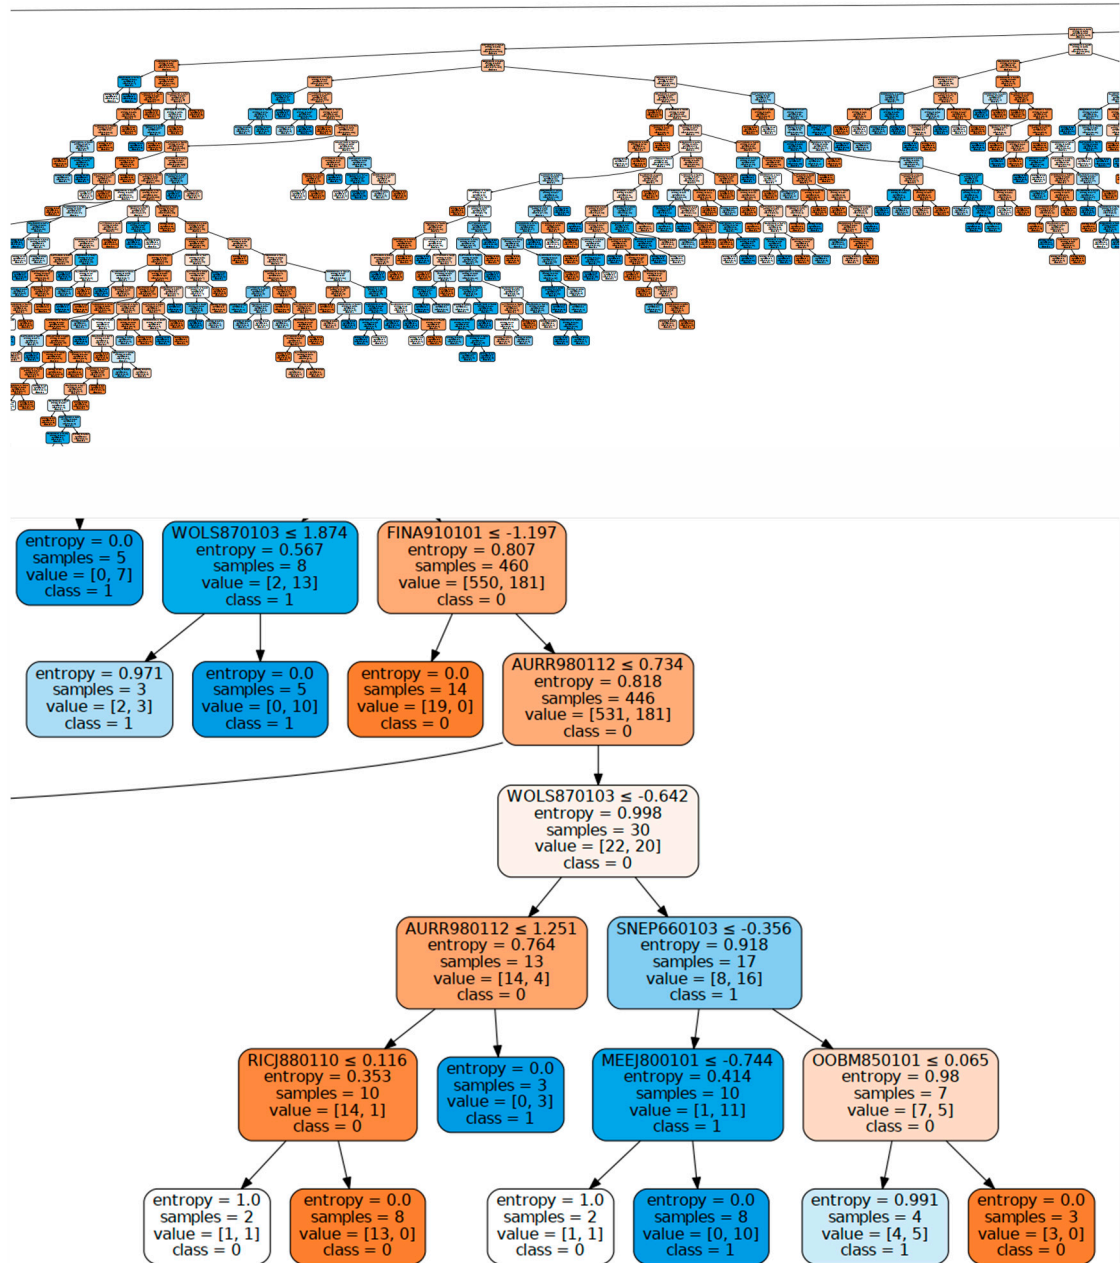

**Figure S5.** Local magnification of binary tree in random forest. The global view of the random forest was shown in the supporting materials named [GolbalViewOfRF.pdf](#).

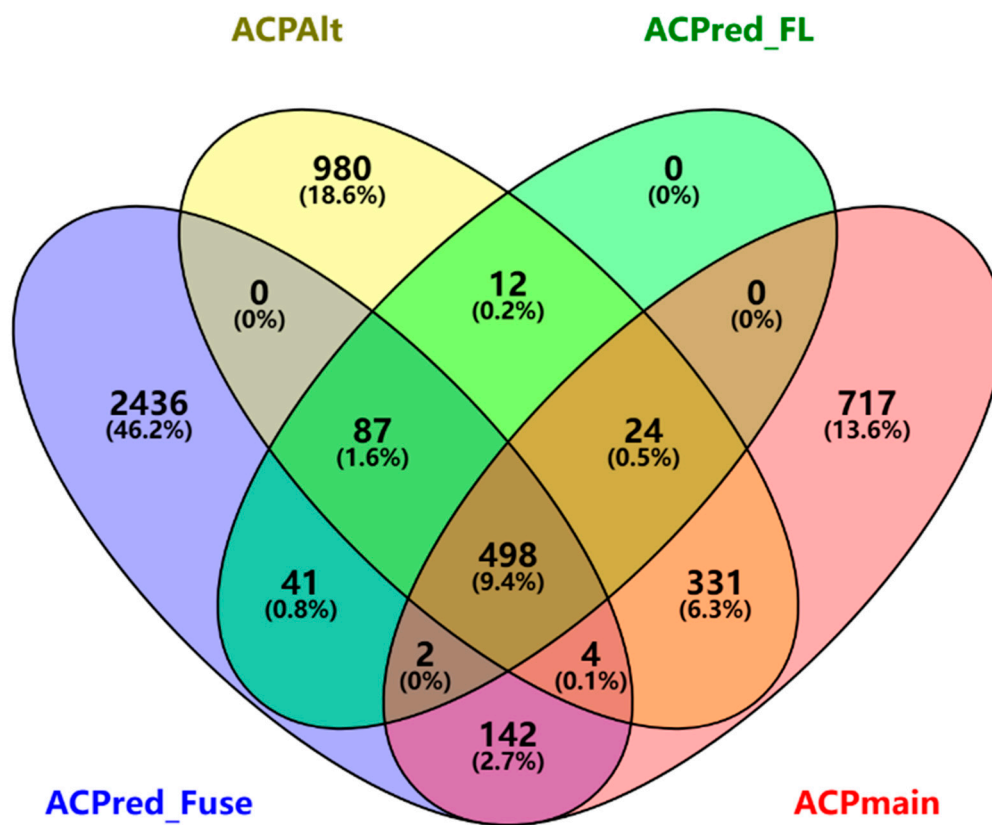

Figure S6. Venn diagram of four benchmark data used in this study. Intersecting sections represent peptide sequences that are common between datasets.



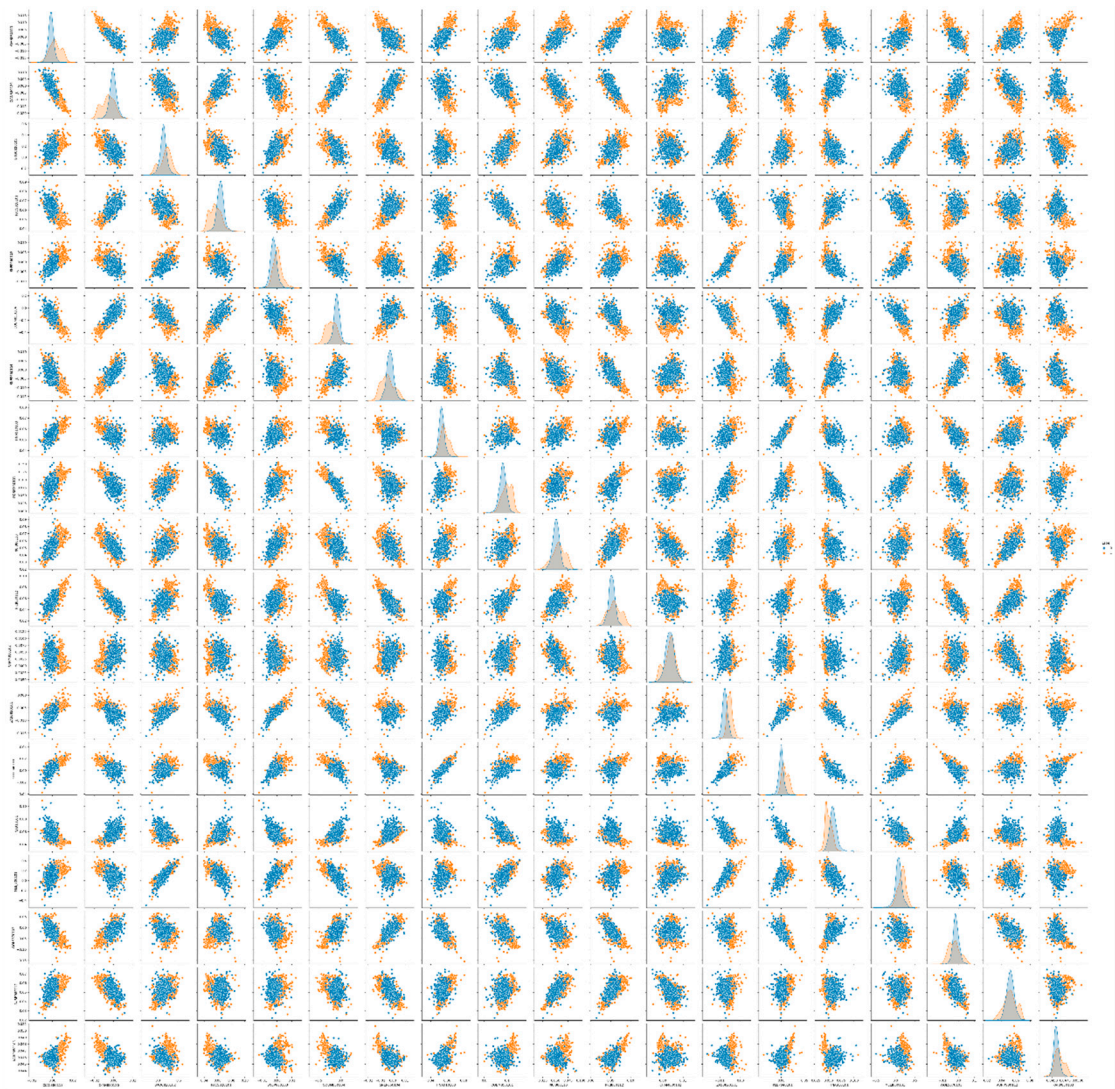

**Figure S7. For the feature data of ACPalt dataset, 19 feature pairwise relationship joint distribution maps.**

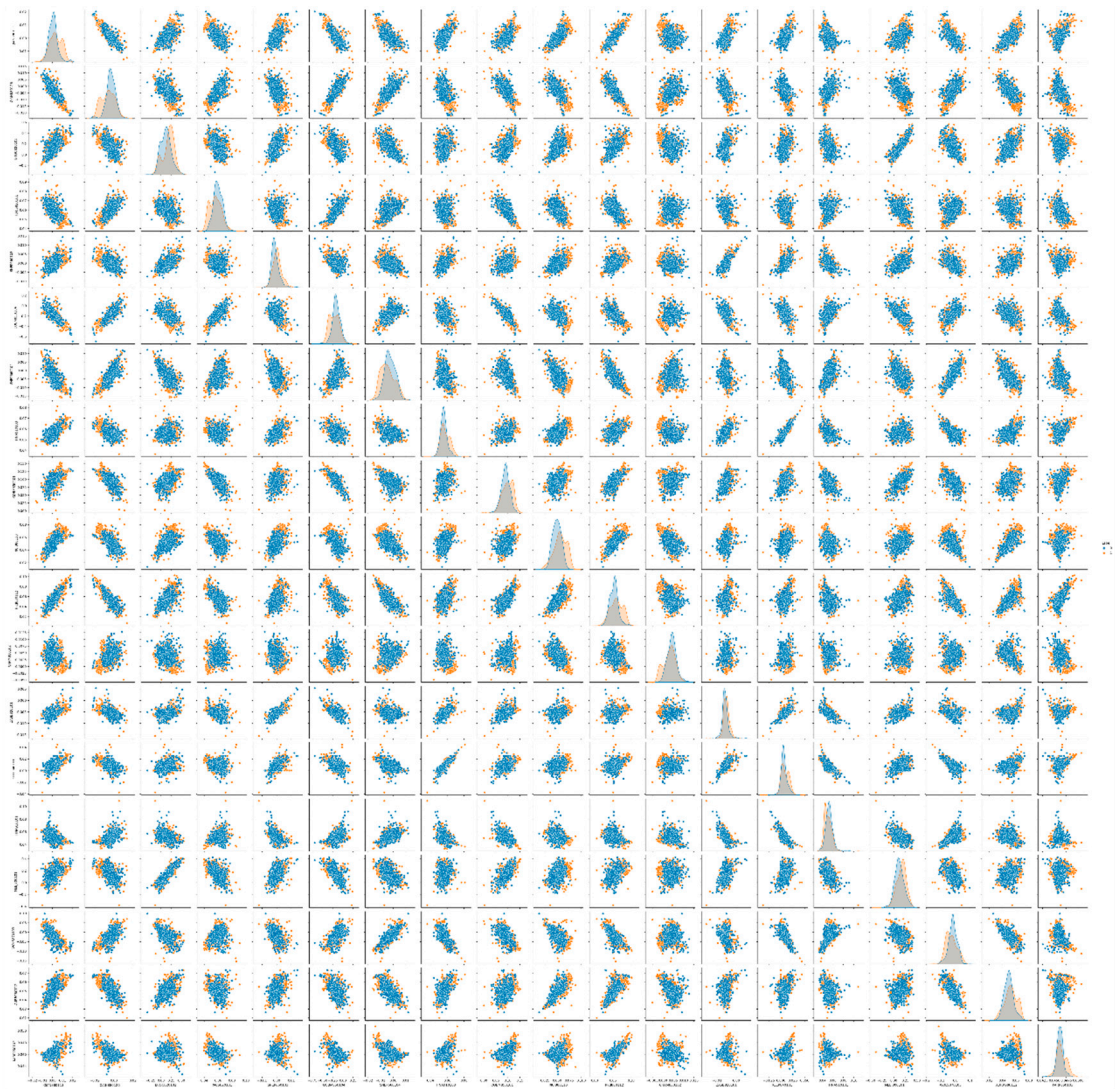

**Figure S8. For the feature data of ACPmain dataset, 19 feature pairwise relationship joint distribution maps**



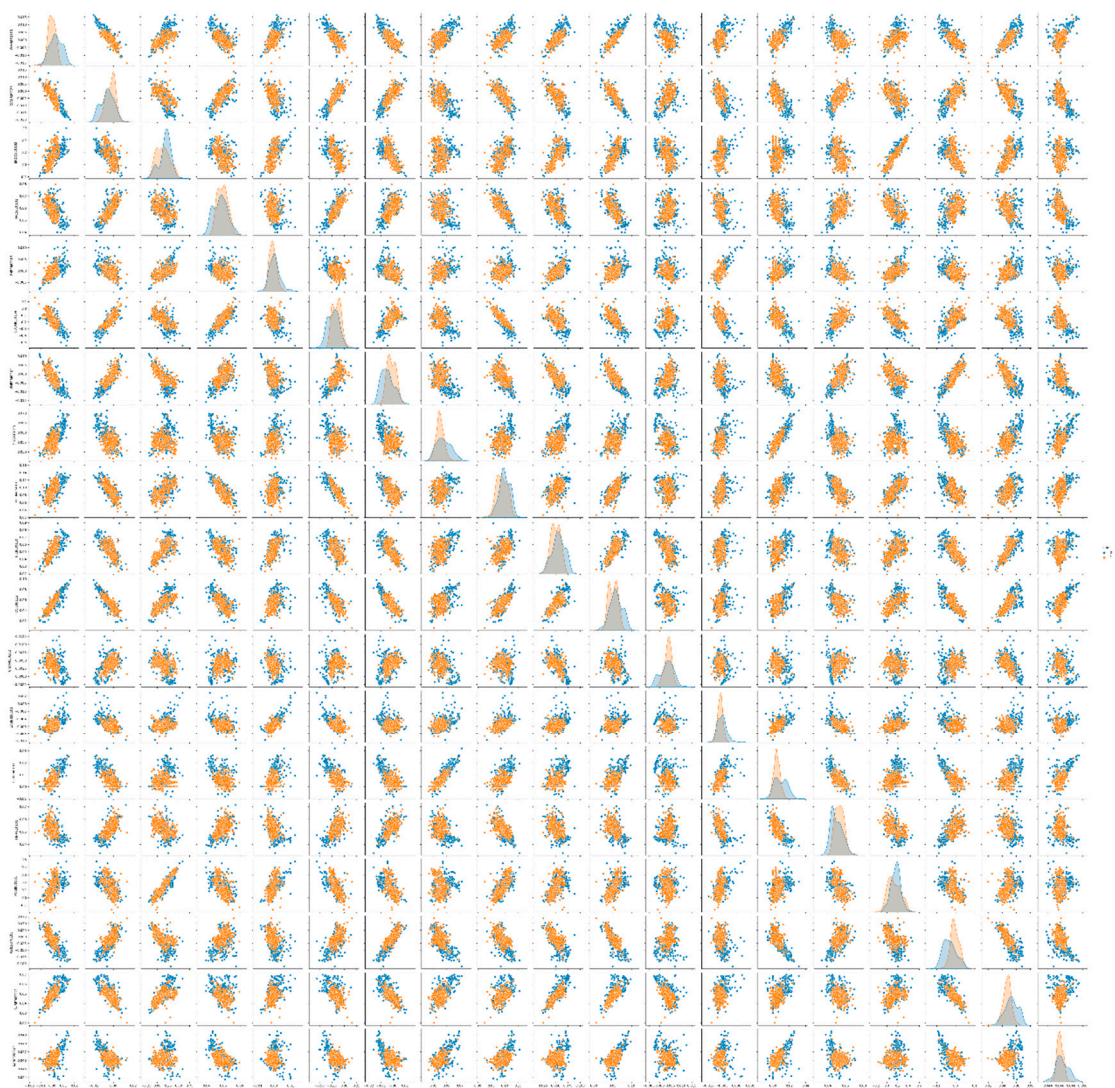

**Figure S9.** For the feature data of ACPred\_FL dataset, 19 feature pairwise relationship joint distribution maps.

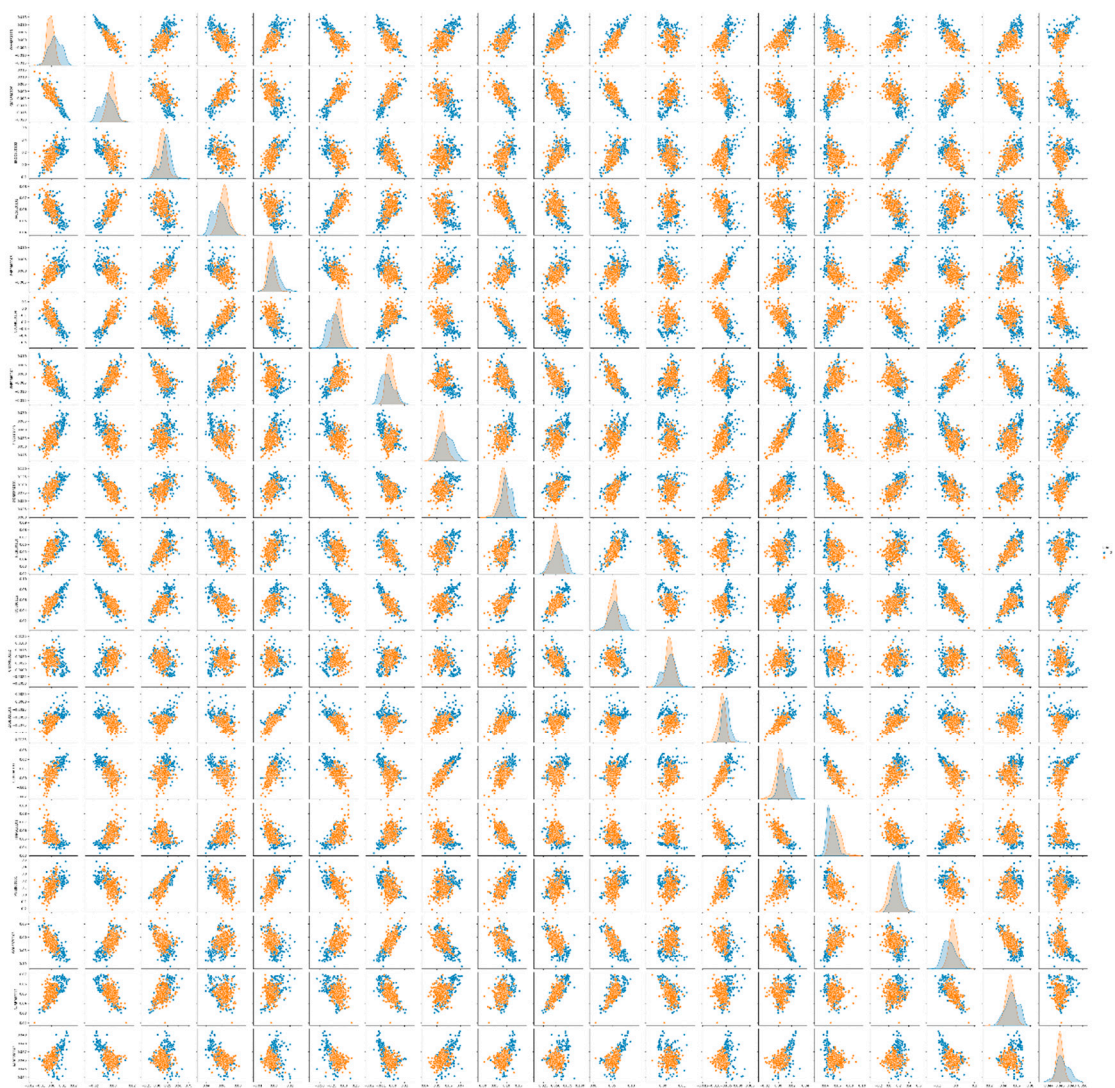

**Figure S10.** For the feature data of ACPred\_Fuse dataset, 19 feature pairwise relationship joint distribution maps.
